# Supplementary material for: A novel cyclic dinuclear gold(i) complex induces anticancer activity via an oxidative stress-mediated intrinsic apoptotic pathway in MDA-MB-231 cancer cells
Source: Royal Society of Chemistry journal article supplement (doi:10.1039/d1dt03546k), 2022-01-01
Supplement: d1dt03546k1.pdf [file d1dt03546k1.pdf]

## **Supplementary Material**

### **A Novel Cyclic Dinuclear Gold(I) Complex Induces Anticancer Activity *via* Oxidative Stress-Mediated Intrinsic Apoptotic Pathway in MDA-MB-231 Cancer Cells**

Ahmed K. Abogosh<sup>a</sup>, Meshal K. Alghanem<sup>a</sup>, Saeed Ahmad<sup>b</sup>, Abdullah Al-Asmari<sup>a</sup>, Homood M As Sobeai<sup>a</sup>, Adam A. A. Sulaiman<sup>c</sup>, Mohammed Fettouhi<sup>c,d</sup>, Saheed A. Popoola<sup>e</sup>, Ali Alhoshani<sup>a</sup> Anvarhusein A. Isab<sup>c,f,\*</sup>

<sup>a</sup>Department of Pharmacology and Toxicology, College of Pharmacy, King Saud University, Riyadh 11451, Saudi Arabia

<sup>b</sup>Department of Chemistry, College of Sciences and Humanities, Prince Sattam bin Abdulaziz University, Al-Kharj 11942, Saudi Arabia

<sup>c</sup>Department of Chemistry, King Fahd University of Petroleum and Minerals, Dhahran 31261, Saudi Arabia

<sup>d</sup>Center for Refining and Advanced Chemicals, King Fahd University of Petroleum and Minerals, Dhahran 31261, Saudi Arabia

<sup>e</sup>Department of Chemistry, Faculty of Science, Islamic University of Madinah, Saudi Arabia

<sup>f</sup>Interdisciplinary Research Center for Advanced Materials, King Fahd University of Petroleum and Minerals, Dhahran 31261, Saudi Arabia

---

\*Author for correspondence (E-mail: [aisab@kfupm.edu.sa](mailto:aisab@kfupm.edu.sa))

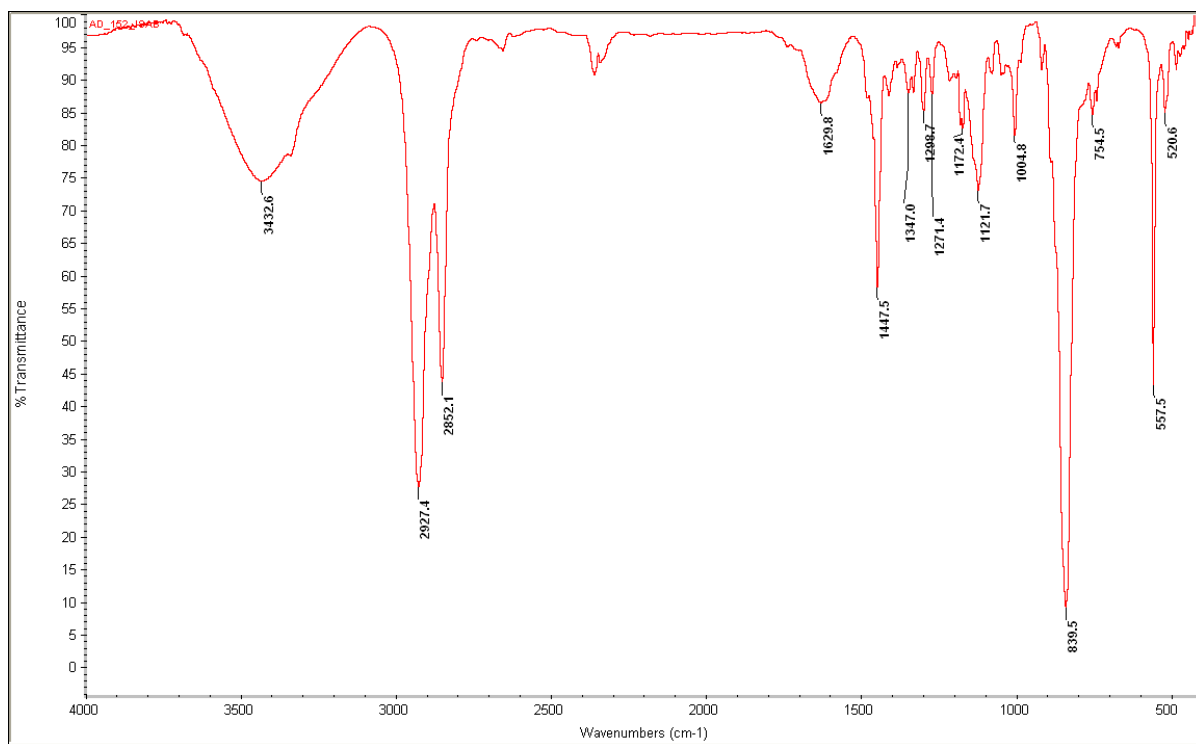

**Figure S1:** Infra-red spectrum of complex 1

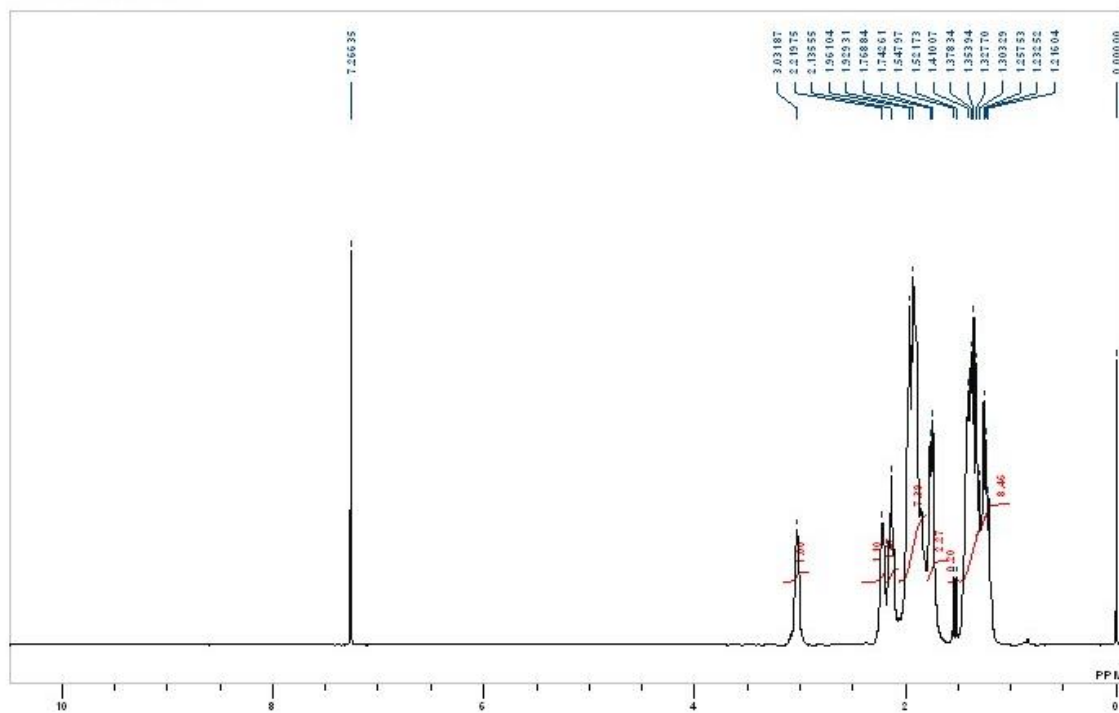

**Figure S2:**  $^1\text{H}$  NMR spectrum of complex **1** in  $\text{CDCl}_3$ .

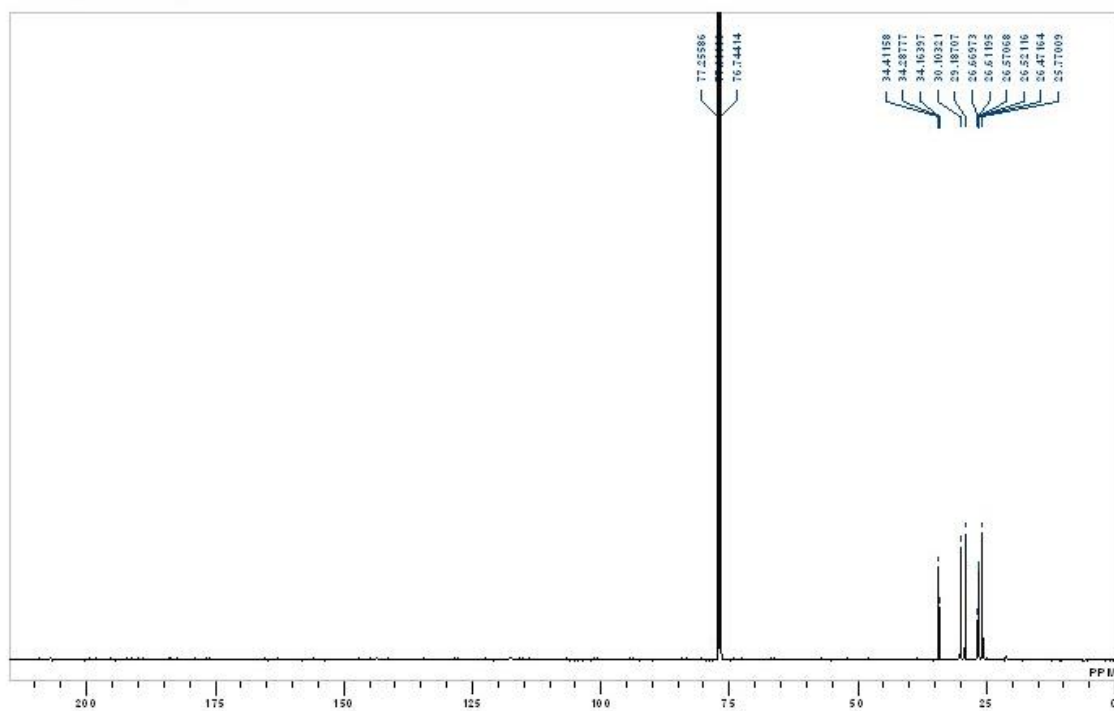

**Figure S3:**  $^{13}\text{C}$  NMR spectrum of complex **1** in  $\text{CDCl}_3$ .

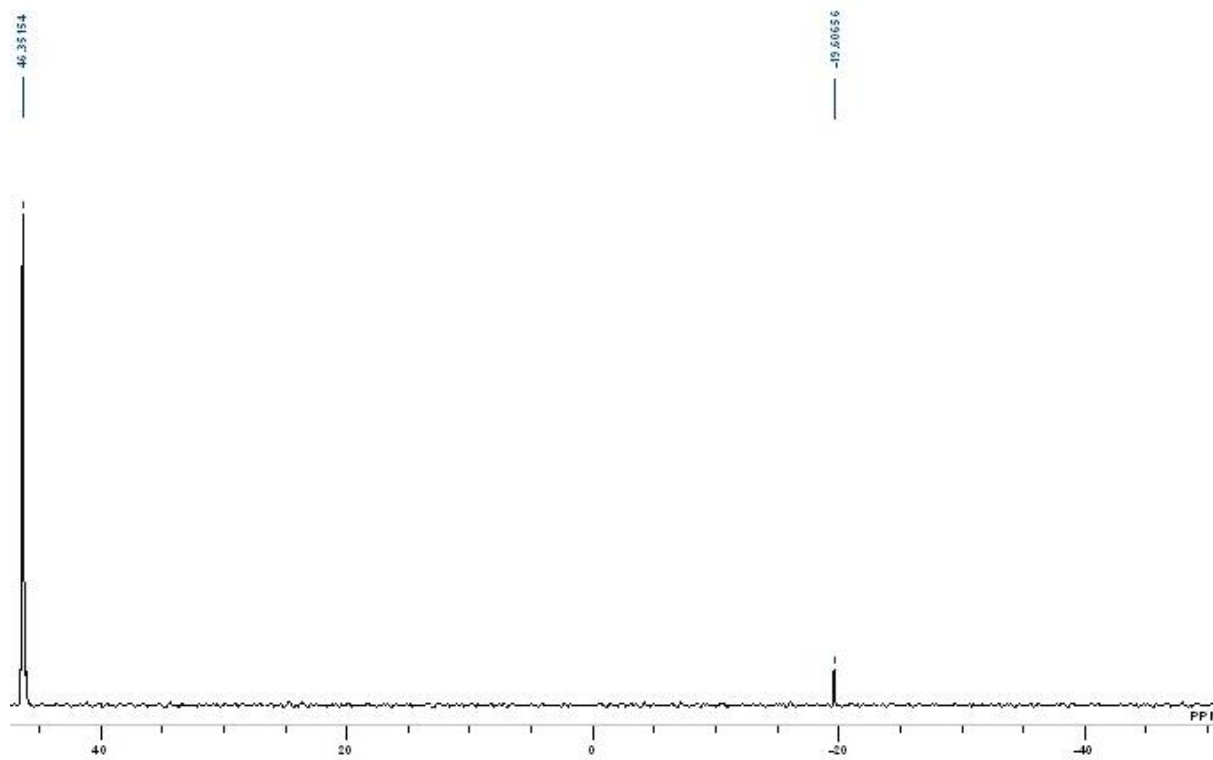

**Figure S4:**  $^{31}\text{P}$  NMR spectrum of complex **1** in  $\text{CDCl}_3$ .

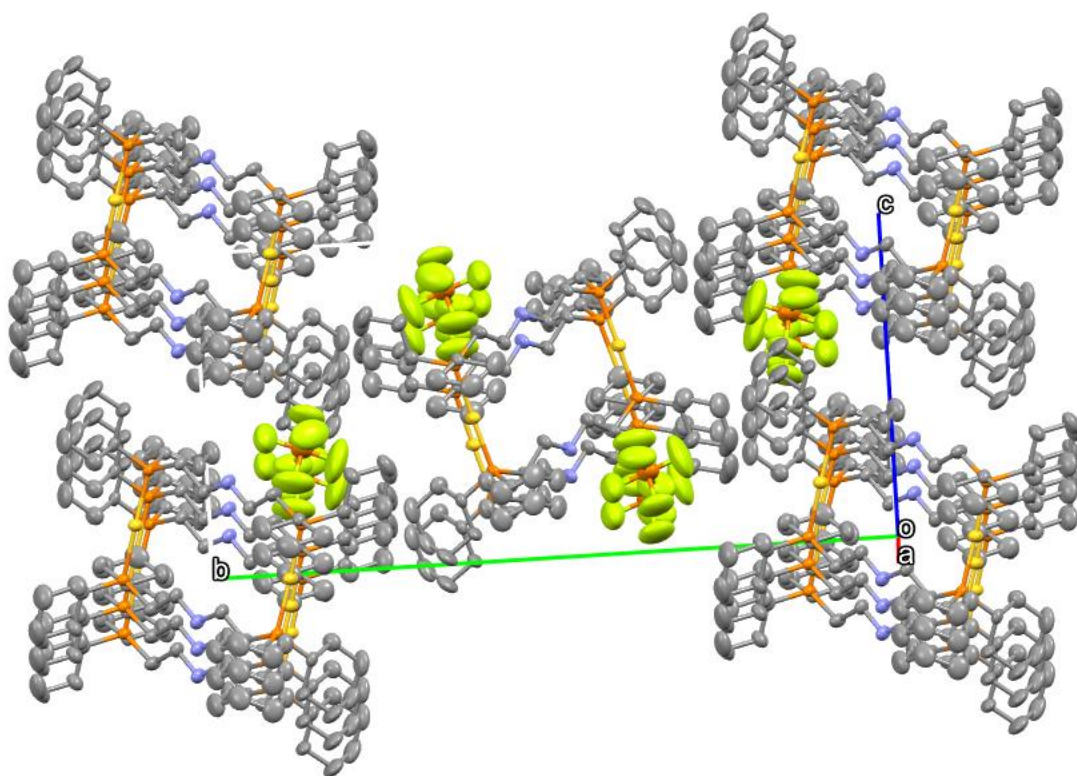

**Figure S5:** Molecular packing in complex **1**
